# Supplementary material for: Genomewide Expression and Functional Interactions of Genes under Drought Stress in Maize
Source: Hindawi journal article supplement (doi:10.1155/2017/2568706), 2017-01-01
Supplement: f1 [file 2568706.f1.pdf]

# Functional interactions of drought-responsive genes indentified through genome-wide expression assay in maize

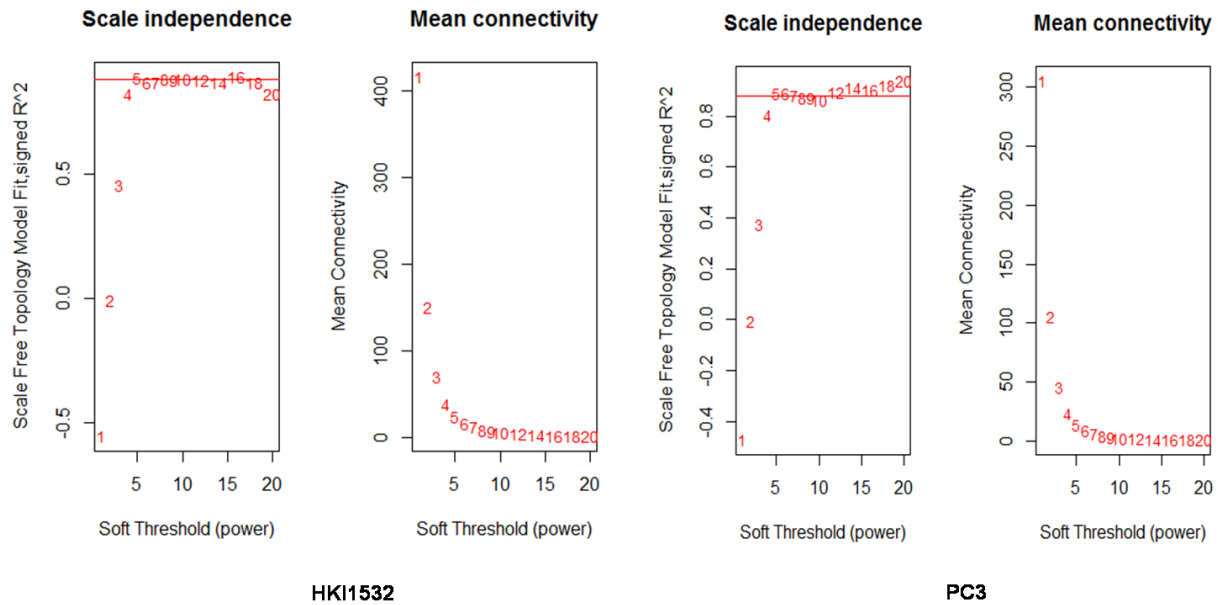

**Supplementary Figure. S1.** Analysis of network topology for various soft-thresholding powers.

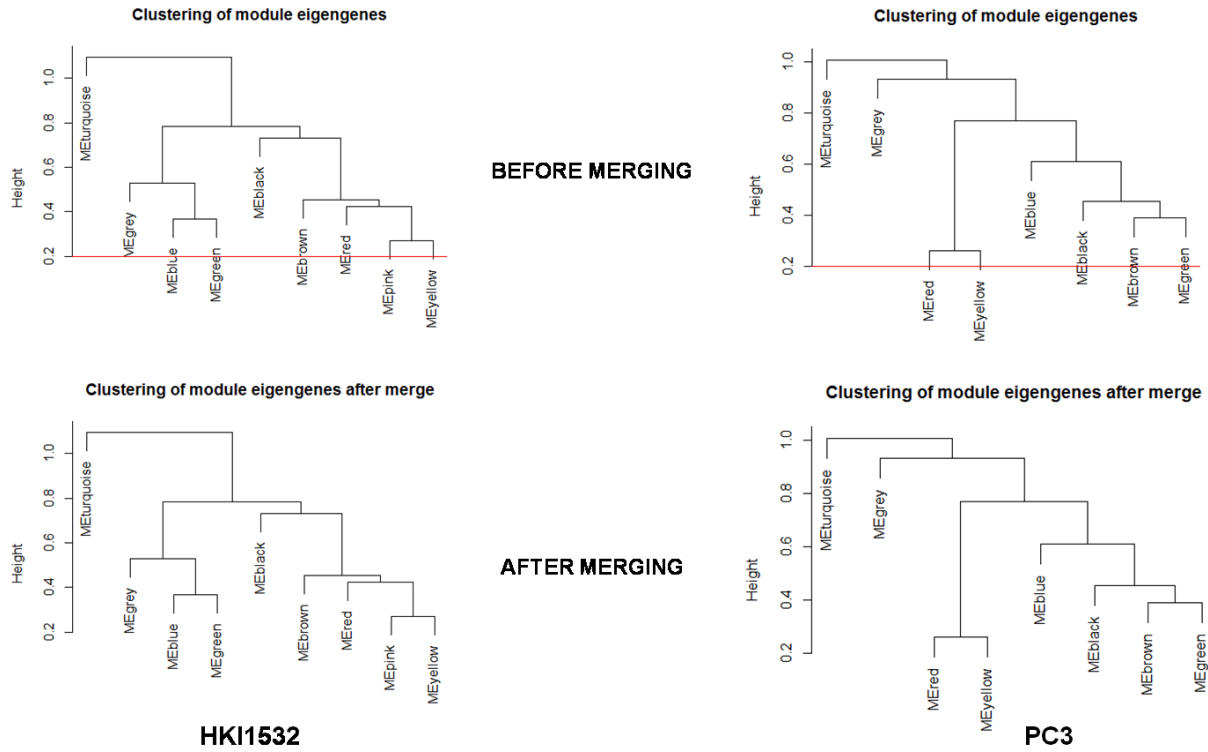

**Supplementary Figure. S2.** Clustering of module eigenvectors (ME) of the co-expression networks comprising nine and eight modules for HKI1532 and PC3 respectively.

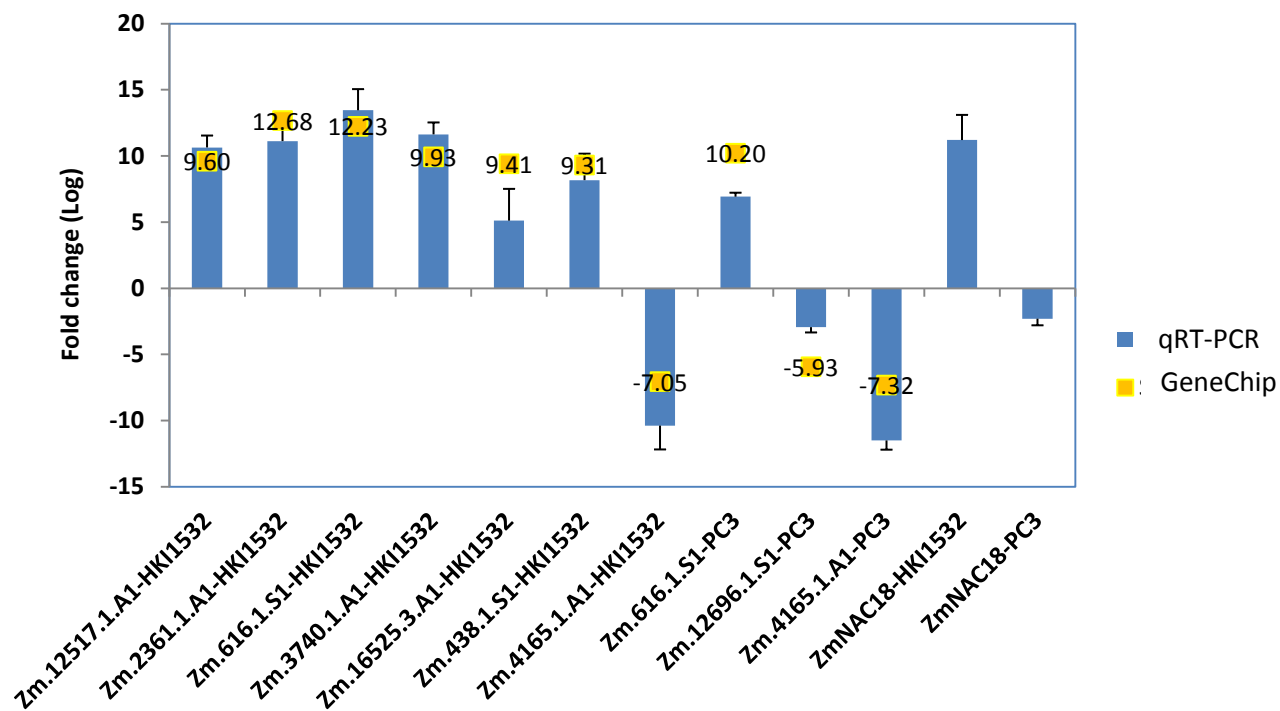

**Figure S3.** Validation of selected DEGs from GeneChip by qRT-PCR tested in HKI1532 (Tolerant) and PC3 (Sensitive) genotypes. ZmNAC18, a previously published drought-responsive gene, is used as an external control. Genechip values are given on the label (orange).

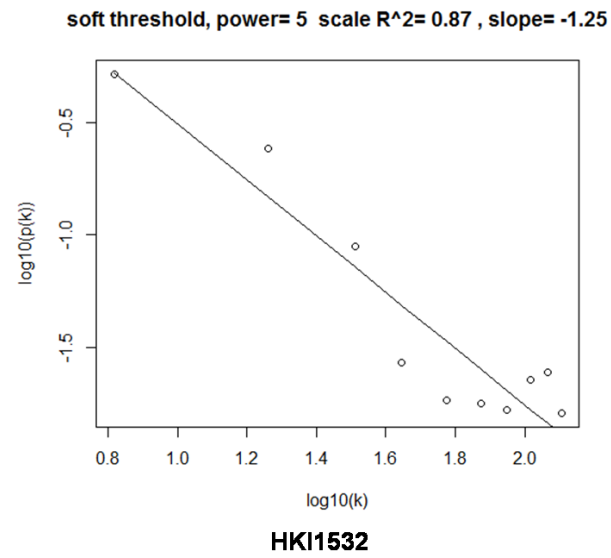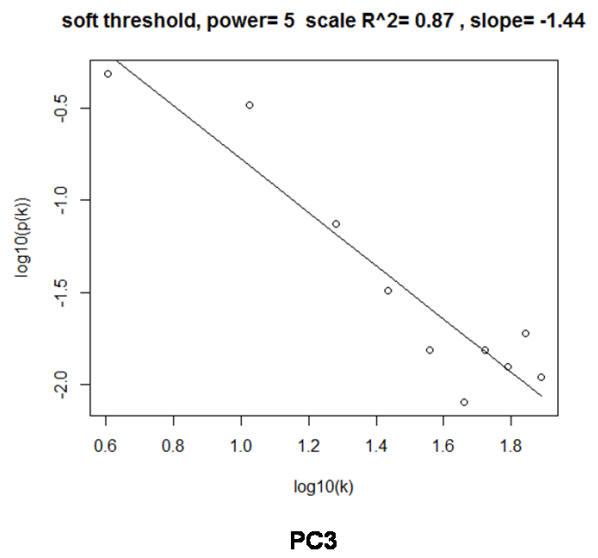

**Supplementary Figure S4.** Scatter plot between the number of edges ( $\log(k)$ ) and the probability of a node having  $k$  edges ( $P(k)$ ).

**Supplementary Table S1.** Selected DEGs from GeneChip for validation by qRT-PCR.

| Probe set ID          | Genotype studied | Annotation                                | Primer sequence                                             | Primer T <sub>m</sub> |
|-----------------------|------------------|-------------------------------------------|-------------------------------------------------------------|-----------------------|
| Zm.12517.1.A1_at      | HKI1532          | kda class iii heat shock protein          | F: AGGTCACCATCGCCTAGAA<br>R: AAAGAGCACTCCACCCATTC           | 62.4<br>62.2          |
| Zm.2361.1.A1_at       | HKI1532          | heat shock protein                        | F: AAGAACGTCCAGATCACCGGCTA<br>R: ATCACTGCACACAACGGGAGTACA   | 60.6<br>60.2          |
| Zm.616.1.S1_at        | HKI1532          | tonoplast intrinsic protein               | F: CGCCAGAGGACTACTAGCTTGAAA<br>R: ACCTGATTACCGTCTCCAACACA   | 57.9<br>61.3          |
| Zm.3740.1.A1_at       | HKI1532          | kda class iv heat shock protein precursor | F: CGTCCAAGGCTGAGATGTGAATGT<br>R: AACGGGATCAATACGCACCGGATA  | 61.0<br>63.9          |
| Zm.16525.3.A1_x_at    | HKI1532          | heat shock protein 82                     | F: GTATGATCAGGTCCGCCATAG<br>R: GTCAGAGACCACAACCTTCTC        | 61.6<br>61.8          |
| Zm.438.1.S1_at        | HKI1532          | heat shock protein 101                    | F: TGTCTCTCTTTACGATCCGGTGT<br>R: ATCTCCTCCTGGATCAGCATCTTC   | 57.8<br>58.6          |
| Zm.4165.1.A1_at       | HKI1532          | phosphoenolpyruvate carboxykinase         | F: AAGAAGAACTTCGAGGTGTTTCGCC<br>R: CGTCGTCGTCGTAATCATCTTCAC | 60.8<br>59.4          |
| Zm.616.1.S1_at        | PC3              | tonoplast intrinsic protein               | F: CGCCAGAGGACTACTAGCTTGAAA<br>R: ACCTGATTACCGTCTCCAACACA   | 57.9<br>61.3          |
| Zm.12696.1.S1_at      | PC3              | myb family transcription expressed        | F: TGCTCGATTCTTCGTCATGGAAC<br>R: CAGCGTCACAATCAATGCGG       | 61.2<br>60.5          |
| Zm.4165.1.A1_at       | PC3              | phosphoenolpyruvate carboxykinase         | F: AAGAAGAACTTCGAGGTGTTTCGCC<br>R: CGTCGTCGTCGTAATCATCTTCAC | 60.8<br>59.4          |
| ZmNAC18*<br>(Control) | HKI1532          | Drought-responsive transcription factor   | F: GAAGAACGAGTGGGAGAAGATG<br>R: ACGAGTGCGAGTGTGATTG         | 62.1<br>62.3          |
| ZmNAC18*<br>(Control) | PC3              | Drought-responsive transcription factor   | F: GAAGAACGAGTGGGAGAAGATG<br>R: ACGAGTGCGAGTGTGATTG         | 62.1<br>62.3          |

\*Kaliyugam S, Rinku S, Krishan K, Yadav SK, Firoz H, Nepolean T (2014). Genome-wide identification and expression pattern of drought-responsive members of the NAC family in maize. *Meta Gene* 2:407-417.

**Supplementary Table S2.** Drought-responsive DEGs exclusively up-regulated in HKI1532.

| Probe ID         | Sequence description                         | log FC      | Absolute FC | <i>p</i> value |
|------------------|----------------------------------------------|-------------|-------------|----------------|
| Zm.622.1.S1_at   | Tonoplast intrinsic protein                  | 7.532183671 | 185.1028978 | 6.35E-06       |
| Zm.19048.1.A1_at | Sorbitol transporter                         | 5.545369448 | 46.70060867 | 5.97E-07       |
| Zm.12135.1.A1_at | Cysteine protease 1 precursor                | 4.820477483 | 28.25584605 | 3.58E-05       |
| Zm.12789.1.A1_at | Cytochrome P450                              | 4.228409653 | 18.74468469 | 5.52E-07       |
| Zm.17956.1.A1_at | Ethylene responsive element binding factor 5 | 4.14001278  | 17.63063803 | 4.22E-09       |
| Zm.280.1.A1_at   | luminal binding protein                      | 4.118441629 | 17.36898603 | 2.67E-07       |
| Zm.13983.1.S1_at | Embryo-specific protein                      | 3.972934156 | 15.70262835 | 4.22E-06       |
| Zm.13506.1.S1_at | Seed maturation protein                      | 3.894397187 | 14.87066426 | 2.82E-06       |
| Zm.395.1.S1_at   | Luminal binding protein                      | 3.795452084 | 13.88496932 | 6.39E-08       |
| Zm.2671.1.S1_at  | Transposon protein en spm sub-class          | 3.616637828 | 12.26638156 | 0.000137       |
| Zm.17912.1.S1_at | Inositol phosphorylceramide synthase1        | 3.598109682 | 12.10985497 | 2.51E-05       |
| Zm.9422.1.A1_at  | WRKY transcription factor 24                 | 3.40291766  | 10.57743313 | 3.97E-05       |
| Zm.4089.2.S1_at  | Hexose transporter                           | 3.066212285 | 8.375714608 | 1.62E-05       |

Table S2 (continued).

| Probe ID         | Sequence description                                      | log FC      | Absolute FC | <i>p</i> value |
|------------------|-----------------------------------------------------------|-------------|-------------|----------------|
| Zm.2793.1.A1_at  | Aldehyde dehydrogenase family 2 member mitochondrial-like | 2.987241482 | 7.929563666 | 0.000106       |
| Zm.16211.1.S1_at | Cell division protein aaa ATPase family                   | 2.805479082 | 6.990904283 | 5.42E-08       |
| Zm.12825.1.S1_at | Tonoplast intrinsic protein                               | 2.783585218 | 6.885613572 | 0.000197       |
| Zm.54.1.S1_at    | Alpha amylase isozyme 3e precursor                        | 2.630964856 | 6.194401324 | 4.2E-06        |
| Zm.8865.1.A1_at  | Integral membrane protein                                 | 2.551747452 | 5.863440526 | 1.55E-05       |
| Zm.12796.1.A1_at | Uncharacterized conserved expressed                       | 2.547823296 | 5.847513537 | 1.24E-05       |
| Zm.15061.1.S1_at | Calmodulin-like protein 14                                | 2.496638576 | 5.64368934  | 4.71E-06       |
| Zm.12327.1.A1_at | Heat shock transcription factor                           | 2.98886809  | 7.938509121 | 1.64E-08       |

**Supplementary Table S3.** Transcription factors unique to HKI1532 and their expression values under water stress.

| Probe ID         | TF       | Sequence description                               | log FC   | Absolute FC |
|------------------|----------|----------------------------------------------------|----------|-------------|
| Zm.15542.1.S1_at | ARF      | IAA9-auxin responsive aux iaa family member        | 2.666122 | 6.347206295 |
| Zm.6938.1.A1_at  | bHLH     |                                                    | 2.85758  | 7.247982958 |
| Zm.10293.1.S1_at | bZIP     | Light inducible protein cprf-2                     | 2.828891 | 7.105276351 |
| Zm.3849.1.S1_at  | bZIP     | Glutamate decarboxylase                            | 4.095848 | 17.0990915  |
| Zm.16522.1.S1_at | C3H      | Kh domain-containing protein                       | 2.379782 | 5.204579588 |
| Zm.5544.1.A1_at  | C3H      | Zinc finger ccch domain-containing protein 11-like | 2.430087 | 5.3892598   |
| Zm.17956.1.A1_at | ERF      | Ethylene responsive element binding factor 5       | 4.140013 | 17.63063803 |
| Zm.7368.1.S1_at  | ERF      | Dehydration-responsive element binding protein 2c  | 2.835316 | 7.136992221 |
| Zm.14048.1.A1_at | GRAS     | Stearoyl-acyl-carrier protein desaturase           | 2.93234  | 7.633474837 |
| Zm.12928.1.A1_at | HB-other | E3- ubiquitin protein ligase ring1-like            | 2.978913 | 7.883918966 |
| Zm.16320.1.S1_at | HB-other | Protein binding protein                            | 3.672082 | 12.74696862 |
| Zm.5362.1.A1_at  | HB-other | Rop guanine nucleotide exchange factor             | 2.981591 | 7.898568637 |
| Zm.4514.1.A1_at  | HD-ZIP   | Homeodomain leucine zipper family IV protein       | 2.752628 | 6.73943558  |



|                    |             |                                                                         |          |             |
|--------------------|-------------|-------------------------------------------------------------------------|----------|-------------|
| Zm.10032.1.S1_at   | HSF         | Heat shock factor<br>protein 4                                          | 3.452248 | 10.94536587 |
| Zm.12327.1.A1_at   | HSF         | Protein                                                                 | 2.988868 | 7.938509121 |
| Zm.15325.1.A1_at   | HSF         | Heat shock factor<br>protein hsf30                                      | 2.68685  | 6.439059398 |
| Zm.15688.1.S1_at   | HSF         |                                                                         | 5.270073 | 38.58779506 |
| Zm.11950.1.A1_at   | LBD         | Receptor like<br>protein kinase<br>hsl1-like                            | 2.951758 | 7.736914835 |
| Zm.13464.1.S1_at   | LBD         | ATP binding<br>protein                                                  | 3.685086 | 12.86237845 |
| Zm.13947.3.A1_at   | LBD         | cipk like protein<br>expressed                                          | 2.738064 | 6.671742128 |
| Zm.13996.1.S1_at   | LBD         | Serine threonine<br>protein kinase<br>ht1-like                          | 3.256065 | 9.55373685  |
| Zm.243.1.A1_at     | LBD         | g-type lectin s-<br>receptor like<br>serine threonine<br>protein kinase | 2.979453 | 7.886871182 |
| Zm.6021.1.A1_at    | LBD         | Receptor protein                                                        | 2.570086 | 5.938449094 |
| Zm.721.1.A1_at     | LBD         | Protein kinase<br>pti1                                                  | 2.555573 | 5.879009144 |
| Zm.11627.1.A1_x_at | MIKC        | mads box<br>transcription<br>factor 26                                  | 3.177698 | 9.048621014 |
| Zm.8773.1.A1_at    | MYB         | Uncharacterized<br>protein                                              | 5.167537 | 35.94045447 |
| Zm.10778.1.A1_a_at | MYB_related | Glabura2<br>expression<br>modulator                                     | 3.049708 | 8.280444176 |
| Zm.18735.1.A1_at   | MYB_related | Ribonucleoprotein<br>like protein                                       | 2.537344 | 5.805194862 |
| Zm.4251.1.S1_at    | MYB_related | Protein disulfide                                                       | 3.249836 | 9.512578603 |

|                     |             |                                                                            |          |             |
|---------------------|-------------|----------------------------------------------------------------------------|----------|-------------|
|                     |             | isomerase                                                                  |          |             |
| Zm.4558.1.S1_at     | MYB_related | Ectonucleotide<br>pyrophosphatase<br>phosphodiesterase<br>family member    | 2.75114  | 6.732487099 |
| Zm.4967.1.A1_at     | MYB_related | Telomere repeat<br>binding protein 5-<br>like                              | 2.834515 | 7.13303164  |
| Zm.7870.1.S1_at     | MYB_related | Protein                                                                    | 4.405614 | 21.19444524 |
| Zm.10304.1.S1_at    | NAC         | 4 protein                                                                  | 3.263138 | 9.60069243  |
| Zm.12113.1.A1_at    | NAC         |                                                                            | 2.430397 | 5.390417005 |
| Zm.5882.1.A1_at     | NAC         | 4 protein                                                                  | 3.850999 | 14.42999231 |
| Zm.13736.1.A1_at    | NF-X1       | nf-x1-type zinc<br>finger protein                                          | 4.153184 | 17.7923362  |
| ZmAffx.1300.1.S1_at | SBP         |                                                                            | 3.850849 | 14.42849441 |
| Zm.17900.1.S1_at    | TCP         | Chaperone<br>protein dnaj                                                  | 3.138252 | 8.804565395 |
| Zm.5083.1.A1_a_at   | TCP         | dnaj protein<br>homolog                                                    | 4.425882 | 21.49430364 |
| Zm.5083.2.A1_x_at   | TCP         | dnaj protein<br>homolog                                                    | 7.830876 | 227.6819593 |
| Zm.5083.3.A1_at     | TCP         | dnaj protein<br>homolog                                                    | 7.445254 | 174.2788527 |
| Zm.10017.1.A1_at    | WRKY        | Wrky69-<br>superfamily of<br>tfs having<br>wrky and zinc<br>finger domains | 3.299544 | 9.846044689 |
| Zm.9422.1.A1_at     | WRKY        |                                                                            | 3.402918 | 10.57743313 |
| Zm.8827.1.A1_at     | YABBY       |                                                                            | 3.153776 | 8.899821159 |

---

**Supplementary Table S4.** A set of 174 selected drought-responsive genes from HKI1532 and their co-expression network groups.

| Probe ID            | Gene                                     | Gene symbol used<br>in Coexpression<br>Network | Absolute<br>FC | Regulation | Group |
|---------------------|------------------------------------------|------------------------------------------------|----------------|------------|-------|
| Zm.10017.1.A1_at    | WRKY                                     | WRKY                                           | 9.8460         | up         | G1    |
| Zm.10304.1.S1_at    | NAC                                      | NAC                                            | 9.6007         | up         | G1    |
| Zm.12113.1.A1_at    | NAC                                      | NAC                                            | 5.3904         | up         | G1    |
| Zm.12327.1.A1_at    | HSF                                      | HSF                                            | 7.9385         | up         | G1    |
| Zm.16211.1.S1_at    | ERF                                      | ERF                                            | 6.9909         | up         | G1    |
| Zm.17956.1.A1_at    | AP2                                      | AP2                                            | 17.6306        | up         | G1    |
| Zm.18735.1.A1_at    | MYB_related                              | MYB_related                                    | 5.8052         | up         | G1    |
| Zm.4558.1.S1_at     | MYB_related                              | MYB_related                                    | 6.7325         | up         | G1    |
| Zm.5112.1.A1_at     | atpase subunit 8                         | ATPase                                         | 7.9600         | up         | G1    |
| Zm.5882.1.A1_at     | NAC                                      | NAC                                            | 14.4300        | up         | G1    |
| Zm.7368.1.S1_at     | AP2                                      | AP2                                            | 7.1370         | up         | G1    |
| Zm.7870.1.S1_at     | MYB_related                              | MYB_related                                    | 21.1944        | up         | G1    |
| Zm.8773.1.A1_at     | MYB                                      | MYB                                            | 35.9405        | up         | G1    |
| Zm.8865.1.A1_at     | WRKY                                     | WRKY                                           | 5.8634         | up         | G1    |
| Zm.9422.1.A1_at     | WRKY                                     | WRKY                                           | 10.5774        | up         | G1    |
| ZmAffx.1219.1.S1_s_ | atp synthase                             | ATP_synthase                                   | 8.7593         | up         | G1    |
| at                  | subunit alpha                            |                                                |                |            |       |
| ZmAffx.1300.1.S1_at | SBP                                      | SBP                                            | 14.4285        | up         | G1    |
| ZmAffx.1401.1.S1_at | atpase subunit 8                         | ATPase                                         | 22.6600        | up         | G1    |
| ZmAffx.1474.1.S1_s_ | atpase subunit 9                         | ATPase                                         | 18.6416        | up         | G1    |
| at                  |                                          |                                                |                |            |       |
| Zm.10383.4.S1_a_at  | NF-YB                                    | NF-YB                                          | 5.6872         | up         | G1    |
| Zm.11645.1.A1_at    | ring-h2 zinc finger<br>protein atl6-like | Ring_H2_ZnFP                                   | 16.5903        | up         | G1    |
| Zm.11783.1.A1_at    | MYB_related                              | MYB_related                                    | 25.2762        | up         | G1    |
| Zm.13603.1.S1_at    | WRKY                                     | WRKY                                           | 10.8794        | up         | G1    |
| Zm.13801.1.S1_at    | ERF                                      | ERF                                            | 6.0215         | up         | G1    |
| Zm.2629.1.S1_at     | bZIP                                     | bZIP                                           | 9.5268         | up         | G1    |
| Zm.2807.1.A1_at     | zf-C2H2_6                                | C2H2                                           | 16.8529        | up         | G1    |
| Zm.4838.1.A1_at     | NAC                                      | NAC                                            | 10.5986        | up         | G1    |
| Zm.5212.1.S1_at     | ERF                                      | ERF                                            | 5.0598         | up         | G1    |
| Zm.5979.1.A1_at     | MYB_related                              | MYB_related                                    | 22.6368        | up         | G1    |
| Zm.6938.1.A1_at     | bHLH                                     | bHLH                                           | 7.2480         | up         | G1    |
| Zm.7780.1.A1_at     | abscisic acid 8 -<br>hydroxylase         | ABA-8H                                         | 9.1029         | up         | G1    |

Table S4 (continued).

| Probe ID         | Gene                                                                                      | Gene symbol used<br>in Coexpression<br>Network | Absolute<br>FC | Regulation | Group |
|------------------|-------------------------------------------------------------------------------------------|------------------------------------------------|----------------|------------|-------|
| Zm.8972.1.S1_at  | AP2                                                                                       | AP2                                            | 136.1449       | up         | G1    |
| Zm.9463.1.A1_at  | ERF                                                                                       | ERF                                            | 31.6441        | up         | G1    |
| Zm.9645.1.S1_at  | MYB_related                                                                               | MYB_related                                    | 5.0466         | up         | G1    |
| Zm.9930.1.A1_at  | Similar to Absciscic<br>stress<br>ripening protein 1<br>ef hand family<br>protein         | ASR_protein                                    | 31.2614        | up         | G1    |
| Zm.11848.1.A1_at | Pkinase                                                                                   | EF_hand_4                                      | 29.6250        | up         | G2    |
| Zm.11950.1.A1_at | calcium-dependent<br>protein kinase                                                       | Pkinase                                        | 7.7369         | up         | G2    |
| Zm.12648.1.A1_at | Pkinase                                                                                   | CDPK                                           | 6.8351         | up         | G2    |
| Zm.13464.1.S1_at | Pkinase                                                                                   | Pkinase                                        | 12.8624        | up         | G2    |
| Zm.13947.3.A1_at | Pkinase                                                                                   | Pkinase                                        | 6.6717         | up         | G2    |
| Zm.13996.1.S1_at | Pkinase_Tyr                                                                               | Pkinase_Tyr                                    | 9.5537         | up         | G2    |
| Zm.15061.1.S1_at | efhand                                                                                    | efhand                                         | 5.6437         | up         | G2    |
| Zm.168.1.A1_at   | receptor-like protein<br>kinase                                                           | Pkinase                                        | 11.1913        | up         | G2    |
| Zm.17842.1.S1_at | EF_hand_5                                                                                 | EF_hand_5                                      | 5.0894         | up         | G2    |
| Zm.5761.1.A1_at  | EF_hand_5                                                                                 | EF_hand_5                                      | 13.1971        | up         | G2    |
| Zm.6021.1.A1_at  | Pkinase                                                                                   | Pkinase                                        | 5.9384         | up         | G2    |
| Zm.721.1.A1_at   | protein kinase ptl1                                                                       | protein_kinase                                 | 5.8790         | up         | G2    |
| Zm.9675.1.A1_at  | signalling.G-proteins                                                                     | G-proteins                                     | 16.5283        | up         | G2    |
| Zm.10267.1.A1_at | Similar to<br>Calmodulin-like<br>protein                                                  | Calmodulin                                     | 44.6102        | up         | G2    |
| Zm.10480.1.S1_at | EF_hand_5                                                                                 | EF_hand_5                                      | 7.6222         | up         | G2    |
| Zm.1162.1.S1_at  | ef-hand calcium<br>binding                                                                | Efhand_Ca                                      | 10.5453        | up         | G2    |
| Zm.11745.1.A1_at | mitogen-activated<br>protein kinase<br>kinase kinase a-like<br>calcium binding<br>protein | MAPKKK-like                                    | 41.5661        | up         | G2    |
| Zm.12139.1.A1_at | with ef-hand motif                                                                        | Efhand_Ca                                      | 23.9415        | up         | G2    |
| Zm.1442.2.S1_at  | EF_hand_5                                                                                 | EF_hand_5                                      | 6.3463         | up         | G2    |

Table S4 (continued).

| Probe ID           | Gene                                                                     | Gene symbol used<br>in Coexpression<br>Network | Absolute<br>FC | Regulation | Group |
|--------------------|--------------------------------------------------------------------------|------------------------------------------------|----------------|------------|-------|
| Zm.15379.1.A1_at   | mitogen-activated<br>protein<br>kinase-like                              | MAPK                                           | 6.4221         | up         | G2    |
| Zm.17723.1.S1_at   | EF_hand_3                                                                | EF_hand_3                                      | 10.6374        | up         | G2    |
| Zm.352.1.S1_at     | calmodulin                                                               | calmodulin                                     | 12.5478        | up         | G2    |
| Zm.5036.1.A1_at    | protein kinase                                                           | protein_kinase                                 | 7.8306         | up         | G2    |
| Zm.5299.1.S1_at    | protein_kinase                                                           | protein_kinase                                 | 9.0731         | up         | G2    |
| Zm.6367.1.S1_at    | acc synthase                                                             | ACC_synthase                                   | 26.9101        | up         | G2    |
| ZmAffx.777.1.A1_at | serine threonine-<br>specific protein<br>kinase npk15-like               | Pkinase_Tyr                                    | 5.7526         | up         | G2    |
| Zm.12842.1.A1_at   | glycolate oxidase                                                        | glycolate_oxydase                              | -10.2520       | down       | G3    |
| Zm.1332.1.S1_at    | atp synthase protein<br>i                                                | ATP_synthase                                   | -11.5518       | down       | G3    |
| Zm.16683.1.S1_at   | chlorophyll a b-<br>binding<br>protein type ii                           | chl_A-B_BP                                     | -5.3993        | down       | G3    |
| Zm.2601.1.S1_at    | glyceraldehyde-3-<br>phosphate                                           | G3PD                                           | 10.3605        | up         | G3    |
| Zm.3449.1.S1_at    | atp synthase delta<br>chain                                              | ATP_synthase                                   | -6.1518        | down       | G3    |
| Zm.3895.2.A1_at    | PS.lightreaction.phot<br>osystem II.<br>PSII polypeptide<br>subunits     | PSII                                           | -6.4430        | down       | G3    |
| Zm.5828.1.A1_at    | phosphoglycerate<br>kinase                                               | PGK                                            | -7.9285        | down       | G3    |
| Zm.6763.1.S1_at    | ribulose- -<br>bisphosphate<br>carboxylase                               | RuBisCo                                        | -6.3449        | down       | G3    |
| Zm.7091.1.A1_at    | oxygenase small<br>subunit<br>chlorophyll a-b<br>binding<br>protein cp24 | chl_A-B_BP                                     | -5.8528        | down       | G3    |

Table S4 (continued).

| Probe ID           | Gene                                             | Gene symbol used<br>in Coexpression<br>Network | Absolute<br>FC | Regulation | Group |
|--------------------|--------------------------------------------------|------------------------------------------------|----------------|------------|-------|
| Zm.10401.1.S1_at   | PS.photorespiration.<br>glycolate oxydase        | glycolate_oxydase                              | -7.9978        | down       | G3    |
| Zm.1088.1.S1_at    | atp synthase gamma<br>chain                      | ATP_synthase                                   | -85.9131       | down       | G3    |
| Zm.13239.2.A1_at   | chlorophyll a-b<br>binding protein 2             | chl_A-B_BP                                     | -6.3594        | down       | G3    |
| Zm.18297.1.S1_at   | fructose- -<br>bisphosphatase                    | FBPase                                         | -90.5095       | down       | G3    |
| Zm.12134.3.A1_a_at | granule-bound starch<br>synthase                 | Stach_synthase                                 | 7.7288         | up         | G4    |
| Zm.18317.1.A1_at   | sucrose phosphate<br>synthase                    | SPS                                            | 8.7263         | up         | G4    |
| Zm.54.1.S1_at      | alpha-amylase<br>isozyme<br>3e precursor         | Alpha-amylase                                  | 6.1944         | up         | G4    |
| Zm.299.1.S1_a_at   | malate synthase                                  | malate_synthase                                | 11.1339        | up         | G4    |
| Zm.3762.1.A1_at    | beta-amylase                                     | beta-amylase                                   | 63.8023        | up         | G4    |
| Zm.3883.1.S1_at    | beta-amylase                                     | beta-amylase                                   | 10.7594        | up         | G4    |
| Zm.409.1.S1_at     | cell wall invertase                              | invertase                                      | 13.0407        | up         | G4    |
| Zm.8365.1.A1_at    | hexokinase 1                                     | hexokinase_1                                   | 7.6251         | up         | G4    |
| Zm.12825.1.S1_at   | tonoplast intrinsic<br>protein                   | TIP3-1                                         | 6.8856         | up         | G5    |
| Zm.171.1.A2_at     | voltage-dependent<br>anion channel               | VDAC                                           | -13.1264       | down       | G5    |
| Zm.622.1.S1_at     | tonoplast intrinsic<br>protein                   | TIP                                            | 185.1029       | up         | G5    |
| Zm.13050.1.A1_at   | integral membrane<br>single<br>c2 domain protein | IMP                                            | 6.7528         | up         | G5    |
| Zm.2959.1.S1_at    | AWPM-19                                          | AWPM-19                                        | 136.2445       | up         | G5    |
| Zm.3906.1.A1_at    | na <sup>+</sup> h <sup>+</sup> antiporter        | Na <sup>+</sup> _H <sup>+</sup> _antiporter    | 19.0454        | up         | G5    |

Table S4 (continued).

| Probe ID          | Gene                                                                                                                     | Gene symbol used<br>in Coexpression<br>Network | Absolute<br>FC | Regulation | Group |
|-------------------|--------------------------------------------------------------------------------------------------------------------------|------------------------------------------------|----------------|------------|-------|
| Zm.43.1.S1_a_at   | Similar to Isoform 2<br>of Late<br>embryogenesis<br>abundant protein<br>vacuolar proton-<br>inorganic<br>pyrophosphatase | LEA                                            | 1315.5604      | up         | G5    |
| Zm.6095.1.S1_at   | tonoplast intrinsic<br>protein                                                                                           | H_PPase                                        | 9.5673         | up         | G5    |
| Zm.616.1.S1_at    | HSF                                                                                                                      | TIP                                            | 4818.6917      | up         | G5    |
| Zm.10032.1.S1_at  | Late embryogenesis<br>abundant (LEA)<br>group 1 family<br>protein                                                        | HSF                                            | 10.9454        | up         | G6    |
| Zm.13506.1.S1_at  | HSF                                                                                                                      | LEA                                            | 14.8707        | up         | G6    |
| Zm.15325.1.A1_at  | heat shock protein<br>90                                                                                                 | HSF                                            | 6.4391         | up         | G6    |
| Zm.16525.1.A1_at  | protein disulfide<br>isomerase                                                                                           | HSP90                                          | 19.4948        | up         | G6    |
| Zm.4251.1.S1_at   | heat shock 70 kda<br>protein 4                                                                                           | PDI                                            | 9.5126         | up         | G6    |
| Zm.4273.2.A1_at   | heat shock protein<br>90                                                                                                 | HSP70                                          | 11.8497        | up         | G6    |
| Zm.5048.6.A1_a_at | subtilisin-like<br>protease                                                                                              | HSP90                                          | 5.1986         | up         | G6    |
| Zm.5970.1.S1_at   | heat shock protein<br>sti-like                                                                                           | subtilisin_protease                            | 5.0545         | up         | G6    |
| Zm.6353.1.S1_at   | hsp20-like<br>chaperone                                                                                                  | Hsp                                            | 8.1336         | up         | G6    |
| Zm.10095.1.A1_at  | heat shock cognate<br>70 kda protein 2                                                                                   | Chaperone                                      | 8.6478         | up         | G6    |
| Zm.12227.1.S1_at  | HSP20                                                                                                                    | HSP70                                          | 439.1870       | up         | G6    |
| Zm.12517.1.A1_at  | heat-shock protein<br>70t-2                                                                                              | HSP20                                          | 777.1541       | up         | G6    |
| Zm.15462.1.S1_at  | kda class ii heat<br>shock protein                                                                                       | HSP70                                          | 605.6317       | up         | G6    |
| Zm.16504.1.A1_at  | kda class ii heat<br>shock protein                                                                                       | classII_Hsp                                    | 164.2669       | up         | G6    |
| Zm.16504.2.A1_at  |                                                                                                                          | classII_Hsp                                    | 608.5566       | up         | G6    |

Table S4 (continued).

| Probe ID           | Gene                                                              | Gene symbol used<br>in Coexpression<br>Network | Absolute<br>FC | Regulation | Group |
|--------------------|-------------------------------------------------------------------|------------------------------------------------|----------------|------------|-------|
| Zm.16505.1.A1_at   | heat shock protein<br>90                                          | HSP90                                          | 8.9312         | up         | G6    |
| Zm.16505.3.A1_at   | heat shock protein<br>90                                          | HSP90                                          | 15.6185        | up         | G6    |
| Zm.16525.2.S1_a_at | heat shock protein<br>90                                          | HSP90                                          | 170.3164       | up         | G6    |
| Zm.16959.2.A1_at   | kda class i heat<br>shock                                         | ClassI_Hsp                                     | 285.0497       | up         | G6    |
| Zm.1882.1.S1_at    | late embryogenesis<br>abundant<br>protein                         | LEA                                            | 6.2180         | up         | G6    |
| Zm.191.1.A1_at     | heat shock protein<br>70                                          | HSP70                                          | 416.5075       | up         | G6    |
| Zm.2361.1.A1_at    | kda class i heat<br>shock protein 1                               | ClassI_Hsp                                     | 6541.7460      | up         | G6    |
| Zm.2482.1.A1_at    | kda class i heat<br>shock protein 1                               | ClassI_Hsp                                     | 67.1456        | up         | G6    |
| Zm.2497.1.S1_at    | heat shock protein                                                | Hsp                                            | 120.9187       | up         | G6    |
| Zm.311.1.A1_at     | kda class ii heat<br>shock protein                                | classII_Hsp                                    | 248.3084       | up         | G6    |
| Zm.369.1.A1_at     | heat-shock protein<br>20                                          | HSP20                                          | 1994.3936      | up         | G6    |
| Zm.3693.1.A1_at    | kda class i heat<br>shock protein 1                               | Class_I_Hsp                                    | 1868.7272      | up         | G6    |
| Zm.3740.1.A1_at    | kda class iv heat<br>shock protein<br>precursor                   | classIV_Hsp                                    | 976.0863       | up         | G6    |
| Zm.438.1.S1_at     | heat shock protein<br>101                                         | Hsp                                            | 635.6821       | up         | G6    |
| Zm.7900.1.A1_at    | atp-dependent clp<br>protease<br>atp-binding subunit<br>precursor | ATP-clp_protease                               | 10.6947        | up         | G6    |
| Zm.11660.1.A1_at   | acetyl- synthetase                                                | Acyl_CoA_ligase                                | 11.4370        | up         | G7    |
| Zm.12135.1.A1_at   | Peptidase_C1                                                      | Peptidase_C1                                   | 28.2558        | up         | G7    |
| Zm.12789.1.A1_at   | cytochrome p450                                                   | p450                                           | 18.7447        | up         | G7    |



Table S4 (continued).

| Probe ID           | Gene                                                             | Gene symbol used<br>in Coexpression<br>Network | Absolute<br>FC | Regulation | Group |
|--------------------|------------------------------------------------------------------|------------------------------------------------|----------------|------------|-------|
| Zm.17912.1.S1_at   | inositol<br>phosphorylceramide<br>synthase 1                     | PAP-like                                       | 12.1099        | up         | G7    |
| Zm.2671.1.S1_at    | Phospholipase A2,<br>active site<br>domain containing<br>protein | Phospholipase_A2                               | 12.2664        | up         | G7    |
| Zm.4877.1.S1_at    | beta-ketoacyl-acp<br>synthase                                    | ACP_synthase                                   | -5.3292        | down       | G7    |
| Zm.7407.1.A1_a_at  | squalene<br>monooxygenase                                        | squalene_MO                                    | 8.1116         | up         | G7    |
| Zm.11770.1.A1_at   | Phospholipase A2,<br>active site<br>domain containing<br>protein | Phospholipase_A2                               | 6.2287         | up         | G7    |
| Zm.12107.1.A1_at   | cytochrome p450                                                  | p450                                           | 32.4015        | up         | G7    |
| Zm.13167.1.A1_at   | phosphatidylserine<br>synthase 2                                 | PSS                                            | 6.5494         | up         | G7    |
| Zm.14226.1.A1_at   | cytochrome p450                                                  | p450                                           | 59.8887        | up         | G7    |
| Zm.15532.1.S1_at   | cytochrome p450<br>89a2-like                                     | p450                                           | 17.5465        | up         | G7    |
| Zm.15540.1.S1_at   | Phospholipase D<br>alpha 1                                       | PhospholipaseD                                 | 7.6308         | up         | G7    |
| Zm.16251.1.A1_at   | protein phosphatase<br>2c abi1                                   | PP2C                                           | 57.5343        | up         | G7    |
| Zm.17264.1.A1_a_at | cytochrome p450<br>81d1-like                                     | p450                                           | 29.2600        | up         | G7    |
| Zm.19112.1.A1_at   | cytochrome p450                                                  | p450                                           | 20.1450        | up         | G7    |
| Zm.2032.1.S1_at    | cytochrome p450                                                  | p450                                           | 11.0156        | up         | G7    |
| Zm.445.1.S1_at     | lipoxygenase 1                                                   | LOX1                                           | 11.0874        | up         | G7    |
| Zm.15542.1.S1_at   | iaa9 - auxin-<br>responsive<br>aux iaa family<br>member          | Aux_IAA                                        | 6.3472         | up         | G8    |

Table S4 (continued).

| Probe ID          | Gene                                                                             | Gene symbol used<br>in Coexpression<br>Network | Absolute<br>FC | Regulation | Group |
|-------------------|----------------------------------------------------------------------------------|------------------------------------------------|----------------|------------|-------|
| Zm.1616.1.A1_at   | Similar to<br>Peroxidase<br>BP 1 precursor<br>flavin-containing<br>monooxygenase | peroxidase1-like                               | -8.7304        | down       | G8    |
| Zm.17905.1.S1_at  | fmo gs-ox-like 3-<br>like                                                        | FMO_like                                       | 6.2131         | up         | G8    |
| Zm.10676.1.S1_at  | 12-oxophytodienoic<br>acid<br>reductase                                          | 12-OPR                                         | 267.2536       | up         | G8    |
| Zm.14498.2.A1_at  | expansin a1<br>xyloglucan<br>endotransglucosylas<br>e                            | expansin_a1                                    | 15.9133        | up         | G8    |
| Zm.1527.2.A1_a_at | hydrolase protein 23<br>precursor<br>xyloglucan                                  | XET_hydrolase                                  | 32.0586        | up         | G8    |
| Zm.15456.1.A1_at  | galactosyltransferase<br>katamari1-like                                          | XET_katamari1                                  | 8.8858         | up         | G8    |
| Zm.704.1.S1_at    | probable xyloglucan<br>endotransglucosylas<br>e<br>hydrolase protein 23          | XET_hydrolase                                  | 28.2553        | up         | G8    |
| Zm.8927.1.S1_at   | cell wall.cell wall<br>proteins.AGPs                                             | AGPs                                           | 129.0533       | up         | G8    |
| Zm.9297.1.A1_at   | cell wall.cell wall<br>proteins.AGPs                                             | AGPs                                           | 64.6181        | up         | G8    |
| Zm.13609.1.S1_at  | tonoplast<br>dicarboxylate<br>transporter-like                                   | TDT                                            | 7.7288         | up         | G9    |
| Zm.14368.1.A1_at  | potassium<br>transporter<br>hak2p                                                | K_transporter                                  | 11.4091        | up         | G9    |
| Zm.19048.1.A1_at  | sorbitol transporter                                                             | Sugar_transporter                              | 46.7006        | up         | G9    |

Table S4 (continued).

| Probe ID           | Gene                                                                     | Gene symbol used<br>in Coexpression<br>Network | Absolute<br>FC | Regulation | Group |
|--------------------|--------------------------------------------------------------------------|------------------------------------------------|----------------|------------|-------|
| Zm.10826.1.S1_at   | vacuolar amino acid<br>transporter 1-like                                | AVT1                                           | 5.2827         | up         | G9    |
| Zm.13688.1.S1_at   | Similar to MtN3<br>protein<br>precursor                                  | MtN3-like                                      | 695.3546       | up         | G9    |
| Zm.16478.3.A1_a_at | abc transporter c<br>family<br>member 8-like                             | ABC_transporter                                | 55.6952        | up         | G9    |
| Zm.19239.1.A1_at   | carbohydrate<br>transporter<br>sugar porter<br>transporter               | CHO_transporter                                | 17.5054        | up         | G9    |
| Zm.4089.1.S1_at    | hexose transporter                                                       | hexose_transporter                             | 8.8766         | up         | G9    |
| Zm.7545.1.A1_at    | sugar transporter                                                        | sugar_transporter                              | 10.2086        | up         | G9    |
| Zm.9995.1.A1_at    | MtN3_slv                                                                 | MtN3                                           | 6.2435         | up         | G9    |
| Zm.107.1.S1_at     | glutamine synthetase                                                     | Gln-synt_C                                     | 155.4548       | up         | G10   |
| Zm.16478.2.S1_at   | aspartate<br>aminotransferase                                            | AspAT                                          | 16.4664        | up         | G10   |
| Zm.17181.1.S1_at   | pyridoxal phosphate-<br>dependent<br>enzyme domain<br>containing protein | PyrdxIP-dep_enz                                | 40.6412        | up         | G10   |
| Zm.17982.1.A1_at   | Amino_oxidase                                                            | Amino_oxidase                                  | 9.3929         | up         | G10   |
| Zm.5534.1.S1_at    | s-<br>adenosylmethionine<br>decarboxylase                                | SAM_decarbox                                   | 7.0383         | up         | G10   |
| Zm.246.1.A1_at     | glutathione s-<br>transferase                                            | GST                                            | 15.1098        | up         | G11   |
| Zm.2793.1.A1_at    | aldehyde<br>dehydrogenase<br>family 2                                    | ADH                                            | 7.9296         | up         | G11   |
| Zm.562.1.A1_at     | glutathione s-<br>transferase<br>gstu6                                   | GST                                            | 9.1296         | up         | G11   |

Table S4 (continued).

| Probe ID          | Gene                                                       | Gene symbol used<br>in Coexpression<br>Network | Absolute<br>FC | Regulation | Group |
|-------------------|------------------------------------------------------------|------------------------------------------------|----------------|------------|-------|
| Zm.5873.1.S1_at   | glutathione s-<br>transferase                              | GST                                            | 7.4667         | up         | G11   |
| Zm.627.1.A1_at    | glutathione s-<br>transferase                              | GST                                            | 9.4673         | up         | G11   |
| Zm.13591.1.S1_at  | probable glutathione<br>s-transferase<br>gstu6-like        | GST                                            | 8.0440         | up         | G11   |
| Zm.1987.2.A1_at   | Superoxide<br>dismutase-3<br>precursor                     | SOD                                            | 22.6019        | up         | G11   |
| Zm.2193.1.A1_at   | glutathione s-<br>transferase<br>gstu6                     | GST                                            | 58.1546        | up         | G11   |
| Zm.3996.1.S1_at   | gdp-mannose<br>pyrophosphorylase                           | GMPase                                         | 17.1766        | up         | G11   |
| Zm.6203.2.A1_a_at | phospholipid<br>hydroperoxide<br>glutathione<br>peroxidase | GPx                                            | 8.4774         | up         | G11   |

**Supplementary Table S5.** Statistical parameters of the co-expression network of genes specific to drought tolerance.

| Probe ID              | Average shortest pathlength | Clustering coefficient | Closeness centrality | Degree | Neighborhood connectivity |
|-----------------------|-----------------------------|------------------------|----------------------|--------|---------------------------|
| Zm.12134.3.A1_a_at    | 2.4765                      | 0.6579                 | 0.4038               | 20     | 32.4500                   |
| Zm.12789.1.A1_at      | 2.9588                      | 0.7619                 | 0.3380               | 7      | 17.5714                   |
| Zm.12825.1.S1_at      | 2.5294                      | 0.6667                 | 0.3953               | 15     | 30.0000                   |
| Zm.12842.1.A1_at      | 3.2059                      | 0.9048                 | 0.3119               | 7      | 16.7143                   |
| Zm.16251.1.A1_at      | 2.3588                      | 0.5810                 | 0.4239               | 23     | 30.7826                   |
| Zm.721.1.A1_at        | 3.0471                      | 0.7143                 | 0.3282               | 8      | 15.5000                   |
| Zm.9995.1.A1_at       | 0.0000                      | 0.0000                 | 0.0000               | 0      | 0.0000                    |
| Zm.10304.1.S1_at      | 2.7765                      | 0.6800                 | 0.3602               | 25     | 23.6400                   |
| Zm.10826.1.S1_at      | 3.2706                      | 0.6667                 | 0.3058               | 3      | 8.6667                    |
| Zm.1162.1.S1_at       | 3.4235                      | 0.8889                 | 0.2921               | 10     | 24.4000                   |
| Zm.11645.1.A1_at      | 2.5765                      | 0.2924                 | 0.3881               | 43     | 16.1163                   |
| Zm.11783.1.A1_at      | 2.8294                      | 0.6341                 | 0.3534               | 24     | 21.7917                   |
| Zm.12107.1.A1_at      | 2.7412                      | 0.7574                 | 0.3648               | 17     | 26.3529                   |
| Zm.12113.1.A1_at      | 2.8588                      | 0.7333                 | 0.3498               | 15     | 26.3333                   |
| Zm.13591.1.S1_at      | 2.8118                      | 0.5000                 | 0.3556               | 4      | 25.2500                   |
| Zm.13609.1.S1_at      | 3.2706                      | 1.0000                 | 0.3058               | 3      | 29.6667                   |
| Zm.168.1.A1_at        | 2.7941                      | 0.5217                 | 0.3579               | 24     | 20.0833                   |
| Zm.17723.1.S1_at      | 2.7176                      | 0.5810                 | 0.3680               | 23     | 22.0000                   |
| Zm.2032.1.S1_at       | 3.9353                      | 0.0000                 | 0.2541               | 1      | 17.0000                   |
| Zm.2671.1.S1_at       | 3.1059                      | 0.6429                 | 0.3220               | 8      | 27.2500                   |
| Zm.3762.1.A1_at       | 3.2765                      | 0.6667                 | 0.3052               | 3      | 13.3333                   |
| Zm.5112.1.A1_at       | 3.2235                      | 0.5357                 | 0.3102               | 8      | 11.7500                   |
| Zm.54.1.S1_at         | 3.2529                      | 0.6667                 | 0.3074               | 4      | 24.5000                   |
| Zm.6938.1.A1_at       | 2.9412                      | 0.5074                 | 0.3400               | 17     | 17.7059                   |
| Zm.7368.1.S1_at       | 3.6412                      | 1.0000                 | 0.2746               | 3      | 27.0000                   |
| Zm.7780.1.A1_at       | 3.3824                      | 0.6667                 | 0.2957               | 3      | 14.3333                   |
| Zm.9422.1.A1_at       | 2.7059                      | 0.4397                 | 0.3696               | 36     | 19.3889                   |
| Zm.9930.1.A1_at       | 2.8471                      | 0.8129                 | 0.3512               | 19     | 26.0000                   |
| ZmAffx.1219.1.S1_s_at | 2.6824                      | 0.5714                 | 0.3728               | 7      | 18.5714                   |
| ZmAffx.1300.1.S1_at   | 2.5353                      | 0.1897                 | 0.3944               | 23     | 11.7826                   |
| ZmAffx.1401.1.S1_at   | 3.2412                      | 1.0000                 | 0.3085               | 5      | 17.2000                   |
| ZmAffx.1474.1.S1_s_at | 3.2412                      | 1.0000                 | 0.3085               | 5      | 17.2000                   |
| Zm.12135.1.A1_at      | 2.3765                      | 0.6739                 | 0.4208               | 24     | 36.4167                   |
| Zm.12327.1.A1_at      | 3.8294                      | 1.0000                 | 0.2611               | 3      | 22.0000                   |
| Zm.12648.1.A1_at      | 3.2824                      | 0.8000                 | 0.3047               | 5      | 20.2000                   |
| Zm.13464.1.S1_at      | 2.9824                      | 0.7524                 | 0.3353               | 15     | 21.9333                   |

Table S5 (continued).

| Probe ID           | Average<br>shortest<br>pathlength | Clustering<br>coefficient | Closeness<br>centrality | Degree | Neighborhood<br>connectivity |
|--------------------|-----------------------------------|---------------------------|-------------------------|--------|------------------------------|
| Zm.13688.1.S1_at   | 3.1706                            | 1.0000                    | 0.3154                  | 3      | 33.3333                      |
| Zm.13996.1.S1_at   | 2.2294                            | 0.4115                    | 0.4485                  | 40     | 27.5250                      |
| Zm.14368.1.A1_at   | 2.2765                            | 0.5161                    | 0.4393                  | 32     | 31.4375                      |
| Zm.14498.2.A1_at   | 2.3706                            | 0.4577                    | 0.4218                  | 28     | 23.1429                      |
| Zm.1527.2.A1_a_at  | 3.0000                            | 0.9697                    | 0.3333                  | 12     | 25.0833                      |
| Zm.15540.1.S1_at   | 3.4824                            | 1.0000                    | 0.2872                  | 2      | 16.5000                      |
| Zm.16211.1.S1_at   | 2.8647                            | 0.7424                    | 0.3491                  | 12     | 25.0000                      |
| Zm.17264.1.A1_a_at | 3.2059                            | 1.0000                    | 0.3119                  | 2      | 29.0000                      |
| Zm.2193.1.A1_at    | 0.0000                            | 0.0000                    | 0.0000                  | 0      | 0.0000                       |
| Zm.2601.1.S1_at    | 2.4118                            | 0.6087                    | 0.4146                  | 23     | 27.4348                      |
| Zm.3996.1.S1_at    | 2.4294                            | 0.6877                    | 0.4116                  | 23     | 36.3043                      |
| Zm.5036.1.A1_at    | 3.0176                            | 0.9000                    | 0.3314                  | 5      | 29.2000                      |
| Zm.5212.1.S1_at    | 2.3118                            | 0.5291                    | 0.4326                  | 28     | 29.6429                      |
| Zm.5299.1.S1_at    | 2.8176                            | 0.7574                    | 0.3549                  | 17     | 24.5882                      |
| Zm.5970.1.S1_at    | 2.9412                            | 0.5667                    | 0.3400                  | 21     | 19.9524                      |
| Zm.6021.1.A1_at    | 2.8824                            | 0.4308                    | 0.3469                  | 23     | 18.1739                      |
| Zm.6095.1.S1_at    | 2.5000                            | 0.6209                    | 0.4000                  | 18     | 24.6111                      |
| Zm.7407.1.A1_a_at  | 2.9294                            | 0.5628                    | 0.3414                  | 22     | 19.2273                      |
| Zm.10095.1.A1_at   | 2.9353                            | 0.8333                    | 0.3407                  | 9      | 16.3333                      |
| Zm.10676.1.S1_at   | 2.8471                            | 0.8363                    | 0.3512                  | 19     | 26.2632                      |
| Zm.13506.1.S1_at   | 2.3941                            | 0.5163                    | 0.4177                  | 18     | 23.7222                      |
| Zm.13603.1.S1_at   | 3.4588                            | 1.0000                    | 0.2891                  | 3      | 38.3333                      |
| Zm.13801.1.S1_at   | 3.2765                            | 1.0000                    | 0.3052                  | 3      | 16.3333                      |
| Zm.15542.1.S1_at   | 2.9941                            | 0.7143                    | 0.3340                  | 8      | 25.6250                      |
| Zm.17181.1.S1_at   | 3.2588                            | 1.0000                    | 0.3069                  | 4      | 19.0000                      |
| Zm.17912.1.S1_at   | 2.7294                            | 0.5101                    | 0.3664                  | 32     | 20.7188                      |
| Zm.17956.1.A1_at   | 2.9059                            | 0.9286                    | 0.3441                  | 8      | 29.1250                      |
| Zm.18735.1.A1_at   | 2.6706                            | 0.4762                    | 0.3744                  | 7      | 15.8571                      |
| Zm.19112.1.A1_at   | 2.8235                            | 0.5628                    | 0.3542                  | 22     | 20.6364                      |
| Zm.1987.2.A1_at    | 2.6529                            | 0.4396                    | 0.3769                  | 14     | 13.0714                      |
| Zm.2959.1.S1_at    | 2.3000                            | 0.4762                    | 0.4348                  | 21     | 26.0476                      |
| Zm.299.1.S1_a_at   | 2.5706                            | 0.9273                    | 0.3890                  | 11     | 49.2727                      |
| Zm.43.1.S1_a_at    | 2.7824                            | 0.5000                    | 0.3594                  | 12     | 12.8333                      |
| Zm.445.1.S1_at     | 2.8765                            | 0.8485                    | 0.3476                  | 12     | 27.3333                      |
| Zm.5534.1.S1_at    | 3.9353                            | 0.0000                    | 0.2541                  | 1      | 17.0000                      |
| Zm.562.1.A1_at     | 3.1353                            | 0.6667                    | 0.3189                  | 3      | 26.0000                      |

Table S5 (Continued).

| Probe ID           | Average<br>shortest<br>pathlength | Clustering<br>coefficient | Closeness<br>centrality | Degree | Neighborhood<br>connectivity |
|--------------------|-----------------------------------|---------------------------|-------------------------|--------|------------------------------|
| Zm.5882.1.A1_at    | 2.7529                            | 0.5862                    | 0.3632                  | 29     | 21.8621                      |
| Zm.616.1.S1_at     | 2.4000                            | 0.5229                    | 0.4167                  | 18     | 22.6667                      |
| Zm.622.1.S1_at     | 2.3941                            | 0.5029                    | 0.4177                  | 19     | 23.4211                      |
| Zm.7900.1.A1_at    | 2.8176                            | 0.7190                    | 0.3549                  | 21     | 25.0000                      |
| Zm.9297.1.A1_at    | 2.6706                            | 0.3846                    | 0.3744                  | 40     | 18.2750                      |
| Zm.10017.1.A1_at   | 2.8118                            | 0.7101                    | 0.3556                  | 24     | 24.2500                      |
| Zm.11770.1.A1_at   | 2.7588                            | 0.6571                    | 0.3625                  | 21     | 23.2857                      |
| Zm.14226.1.A1_at   | 2.8941                            | 0.7576                    | 0.3455                  | 12     | 24.7500                      |
| Zm.6367.1.S1_at    | 2.8588                            | 0.8476                    | 0.3498                  | 15     | 26.8667                      |
| Zm.9675.1.A1_at    | 3.0000                            | 1.0000                    | 0.3333                  | 6      | 22.6667                      |
| Zm.1442.2.S1_at    | 2.9176                            | 0.6813                    | 0.3427                  | 14     | 23.0000                      |
| Zm.15379.1.A1_at   | 4.4059                            | 0.0000                    | 0.2270                  | 1      | 10.0000                      |
| Zm.2629.1.S1_at    | 2.4529                            | 0.6397                    | 0.4077                  | 17     | 35.1765                      |
| Zm.352.1.S1_at     | 2.7882                            | 0.6209                    | 0.3586                  | 18     | 22.5556                      |
| Zm.5761.1.A1_at    | 3.4118                            | 0.5333                    | 0.2931                  | 10     | 14.5000                      |
| Zm.6203.2.A1_a_at  | 3.6353                            | 1.0000                    | 0.2751                  | 3      | 32.6667                      |
| Zm.8865.1.A1_at    | 2.9294                            | 0.3571                    | 0.3414                  | 8      | 15.2500                      |
| Zm.12517.1.A1_at   | 2.9000                            | 0.7895                    | 0.3448                  | 19     | 19.0000                      |
| Zm.15462.1.S1_at   | 2.7118                            | 0.5671                    | 0.3688                  | 22     | 18.5909                      |
| Zm.16504.1.A1_at   | 2.8529                            | 0.8562                    | 0.3505                  | 18     | 20.5000                      |
| Zm.16504.2.A1_at   | 2.9118                            | 0.9118                    | 0.3434                  | 17     | 20.1176                      |
| Zm.16505.3.A1_at   | 2.7941                            | 0.7310                    | 0.3579                  | 19     | 22.0000                      |
| Zm.16525.1.A1_at   | 3.0647                            | 0.5909                    | 0.3263                  | 12     | 18.0833                      |
| Zm.16525.2.S1_a_at | 2.5000                            | 0.4091                    | 0.4000                  | 12     | 36.8333                      |
| Zm.16959.2.A1_at   | 2.8471                            | 0.8070                    | 0.3512                  | 19     | 19.8421                      |
| Zm.191.1.A1_at     | 2.3353                            | 0.4933                    | 0.4282                  | 25     | 32.4000                      |
| Zm.2361.1.A1_at    | 2.9118                            | 0.9118                    | 0.3434                  | 17     | 20.1176                      |
| Zm.2497.1.S1_at    | 2.9000                            | 0.7895                    | 0.3448                  | 19     | 19.0000                      |
| Zm.311.1.A1_at     | 2.9118                            | 0.9118                    | 0.3434                  | 17     | 20.1176                      |
| Zm.369.1.A1_at     | 2.8176                            | 0.6952                    | 0.3549                  | 21     | 19.5238                      |
| Zm.3693.1.A1_at    | 2.8882                            | 0.5417                    | 0.3462                  | 16     | 17.5625                      |
| Zm.3740.1.A1_at    | 3.4765                            | 1.0000                    | 0.2876                  | 12     | 19.2500                      |
| Zm.4273.2.A1_at    | 2.8588                            | 0.5931                    | 0.3498                  | 22     | 17.5909                      |
| Zm.438.1.S1_at     | 2.8235                            | 0.7158                    | 0.3542                  | 20     | 19.6000                      |
| Zm.5873.1.S1_at    | 3.6059                            | 0.8611                    | 0.2773                  | 9      | 19.7778                      |
| Zm.5979.1.A1_at    | 3.6647                            | 1.0000                    | 0.2729                  | 2      | 21.5000                      |

Table S5 (Continued).

| Probe ID           | Average<br>shortest<br>pathlength | Clustering<br>coefficient | Closeness<br>centrality | Degree | Neighborhood<br>connectivity |
|--------------------|-----------------------------------|---------------------------|-------------------------|--------|------------------------------|
| Zm.6353.1.S1_at    | 2.8353                            | 0.4929                    | 0.3527                  | 27     | 21.0741                      |
| Zm.7870.1.S1_at    | 2.9059                            | 0.7053                    | 0.3441                  | 20     | 18.5500                      |
| Zm.10032.1.S1_at   | 2.2765                            | 0.5931                    | 0.4393                  | 22     | 30.8182                      |
| Zm.10267.1.A1_at   | 2.7118                            | 0.5394                    | 0.3688                  | 29     | 21.0345                      |
| Zm.10401.1.S1_at   | 2.6176                            | 0.9500                    | 0.3820                  | 16     | 40.3125                      |
| Zm.10480.1.S1_at   | 2.9176                            | 0.8030                    | 0.3427                  | 12     | 23.5833                      |
| Zm.107.1.S1_at     | 2.7059                            | 1.0000                    | 0.3696                  | 8      | 53.5000                      |
| Zm.1088.1.S1_at    | 1.8353                            | 0.3091                    | 0.5449                  | 56     | 23.0357                      |
| Zm.11660.1.A1_at   | 2.7000                            | 1.0000                    | 0.3704                  | 9      | 52.4444                      |
| Zm.11745.1.A1_at   | 2.4588                            | 0.5000                    | 0.4067                  | 4      | 43.5000                      |
| Zm.11848.1.A1_at   | 2.9471                            | 0.8667                    | 0.3393                  | 10     | 23.2000                      |
| Zm.11950.1.A1_at   | 2.3529                            | 0.6397                    | 0.4250                  | 17     | 34.1765                      |
| Zm.12139.1.A1_at   | 2.3706                            | 0.5556                    | 0.4218                  | 18     | 38.1111                      |
| Zm.12227.1.S1_at   | 2.6353                            | 1.0000                    | 0.3795                  | 13     | 46.1538                      |
| Zm.13050.1.A1_at   | 2.7824                            | 1.0000                    | 0.3594                  | 2      | 57.5000                      |
| Zm.13167.1.A1_at   | 2.7353                            | 1.0000                    | 0.3656                  | 6      | 54.8333                      |
| Zm.13239.2.A1_at   | 1.9941                            | 0.4061                    | 0.5015                  | 47     | 25.0000                      |
| Zm.1332.1.S1_at    | 1.8529                            | 0.2887                    | 0.5397                  | 59     | 22.0000                      |
| Zm.13947.3.A1_at   | 2.5882                            | 0.9231                    | 0.3864                  | 14     | 42.9286                      |
| Zm.15325.1.A1_at   | 3.8294                            | 1.0000                    | 0.2611                  | 3      | 22.0000                      |
| Zm.15456.1.A1_at   | 2.2824                            | 0.5365                    | 0.4381                  | 34     | 29.5588                      |
| Zm.15532.1.S1_at   | 2.2353                            | 0.3942                    | 0.4474                  | 28     | 26.8214                      |
| Zm.1616.1.A1_at    | 2.4824                            | 0.7879                    | 0.4028                  | 22     | 34.3182                      |
| Zm.16478.2.S1_at   | 2.3941                            | 0.4815                    | 0.4177                  | 27     | 28.5556                      |
| Zm.16478.3.A1_a_at | 2.9647                            | 0.8095                    | 0.3373                  | 7      | 21.4286                      |
| Zm.16683.1.S1_at   | 1.9294                            | 0.3529                    | 0.5183                  | 49     | 23.7959                      |
| Zm.171.1.A2_at     | 2.7353                            | 1.0000                    | 0.3656                  | 6      | 54.8333                      |
| Zm.17842.1.S1_at   | 2.3471                            | 0.5556                    | 0.4261                  | 19     | 37.6842                      |
| Zm.17905.1.S1_at   | 2.6882                            | 1.0000                    | 0.3720                  | 11     | 49.4545                      |
| Zm.17982.1.A1_at   | 2.6941                            | 1.0000                    | 0.3712                  | 10     | 52.1000                      |
| Zm.18297.1.S1_at   | 1.8235                            | 0.3156                    | 0.5484                  | 56     | 23.0000                      |
| Zm.18317.1.A1_at   | 2.7059                            | 1.0000                    | 0.3696                  | 8      | 53.5000                      |
| Zm.1882.1.S1_at    | 2.6412                            | 1.0000                    | 0.3786                  | 12     | 48.1667                      |
| Zm.19048.1.A1_at   | 2.8000                            | 1.0000                    | 0.3571                  | 4      | 53.5000                      |
| Zm.19239.1.A1_at   | 2.4118                            | 0.6444                    | 0.4146                  | 10     | 34.0000                      |
| Zm.246.1.A1_at     | 2.6353                            | 1.0000                    | 0.3795                  | 13     | 45.6923                      |



Table S5 (Continued).

| Probe ID           | Average<br>shortest<br>pathlength | Clustering<br>coefficient | Closeness<br>centrality | Degree | Neighborhood<br>connectivity |
|--------------------|-----------------------------------|---------------------------|-------------------------|--------|------------------------------|
| Zm.2482.1.A1_at    | 2.6824                            | 1.0000                    | 0.3728                  | 12     | 47.1667                      |
| Zm.2793.1.A1_at    | 2.4294                            | 0.8789                    | 0.4116                  | 20     | 38.9500                      |
| Zm.2807.1.A1_at    | 2.8647                            | 0.6947                    | 0.3491                  | 20     | 22.3000                      |
| Zm.3449.1.S1_at    | 1.8706                            | 0.3235                    | 0.5346                  | 54     | 23.4444                      |
| Zm.3883.1.S1_at    | 2.5706                            | 0.6111                    | 0.3890                  | 9      | 44.2222                      |
| Zm.3895.2.A1_at    | 1.9588                            | 0.3620                    | 0.5105                  | 52     | 24.0962                      |
| Zm.3906.1.A1_at    | 2.7294                            | 1.0000                    | 0.3664                  | 5      | 54.2000                      |
| Zm.4089.1.S1_at    | 2.4706                            | 0.6286                    | 0.4048                  | 15     | 41.0000                      |
| Zm.409.1.S1_at     | 2.6412                            | 1.0000                    | 0.3786                  | 2      | 43.5000                      |
| Zm.4838.1.A1_at    | 2.3235                            | 0.5238                    | 0.4304                  | 15     | 33.8000                      |
| Zm.4877.1.S1_at    | 2.6824                            | 1.0000                    | 0.3728                  | 12     | 46.6667                      |
| Zm.5828.1.A1_at    | 1.8647                            | 0.3111                    | 0.5363                  | 55     | 22.8182                      |
| Zm.627.1.A1_at     | 2.5529                            | 0.7628                    | 0.3917                  | 23     | 32.0000                      |
| Zm.6763.1.S1_at    | 1.9882                            | 0.3963                    | 0.5030                  | 48     | 25.0833                      |
| Zm.704.1.S1_at     | 2.5471                            | 0.9848                    | 0.3926                  | 12     | 48.5833                      |
| Zm.7091.1.A1_at    | 2.0706                            | 0.4313                    | 0.4830                  | 45     | 25.6444                      |
| Zm.8365.1.A1_at    | 2.3412                            | 0.5000                    | 0.4271                  | 21     | 38.2381                      |
| Zm.8773.1.A1_at    | 2.3059                            | 0.6159                    | 0.4337                  | 24     | 26.5000                      |
| Zm.8927.1.S1_at    | 0.0000                            | 0.0000                    | 0.0000                  | 0      | 0.0000                       |
| Zm.8972.1.S1_at    | 2.3471                            | 0.7474                    | 0.4261                  | 20     | 38.1500                      |
| Zm.9463.1.A1_at    | 2.8235                            | 0.5947                    | 0.3542                  | 20     | 21.0000                      |
| Zm.9645.1.S1_at    | 2.8471                            | 0.0000                    | 0.3512                  | 1      | 59.0000                      |
| ZmAffx.777.1.A1_at | 2.5059                            | 0.9810                    | 0.3991                  | 15     | 44.4667                      |
| Zm.10383.4.S1_a_at | 2.2647                            | 0.4507                    | 0.4416                  | 29     | 31.2759                      |
| Zm.15061.1.S1_at   | 3.8176                            | 0.0000                    | 0.2619                  | 1      | 20.0000                      |
| Zm.16505.1.A1_at   | 2.7176                            | 0.4803                    | 0.3680                  | 29     | 20.8621                      |
| Zm.4251.1.S1_at    | 2.9529                            | 0.6952                    | 0.3386                  | 15     | 21.4000                      |
| Zm.4558.1.S1_at    | 2.9471                            | 0.6618                    | 0.3393                  | 17     | 20.6471                      |
| Zm.5048.6.A1_a_at  | 2.9529                            | 0.6857                    | 0.3386                  | 15     | 22.2000                      |
| Zm.7545.1.A1_at    | 3.0294                            | 0.6667                    | 0.3301                  | 4      | 20.2500                      |
